# Supplementary material for: The interplay among sleep patterns, social habits, and environmental cues: insights from the Spanish population and implications for aligning daily rhythms
Source: PubMed Central journal article supplement (PMC11543482; doi:10.3389/fphys.2024.1323127), 2024-10-25
Supplement: DataSheet1.pdf [file DataSheet1.pdf]

## Supplementary Material

# The Interplay between Sleep Patterns, Social Habits, and Environmental Cues: Insights from the Spanish Population and implications on circadian health

María-Ángeles Bonmatí-Carrión \*, Jesús Vicente-Martínez, Juan Antonio Madrid, Maria-Angel Rol

\* Correspondence: María-Ángeles Bonmatí-Carrión: [mabonmati@um.es](mailto:mabonmati@um.es)

### 1 Supplementary Figures and Tables

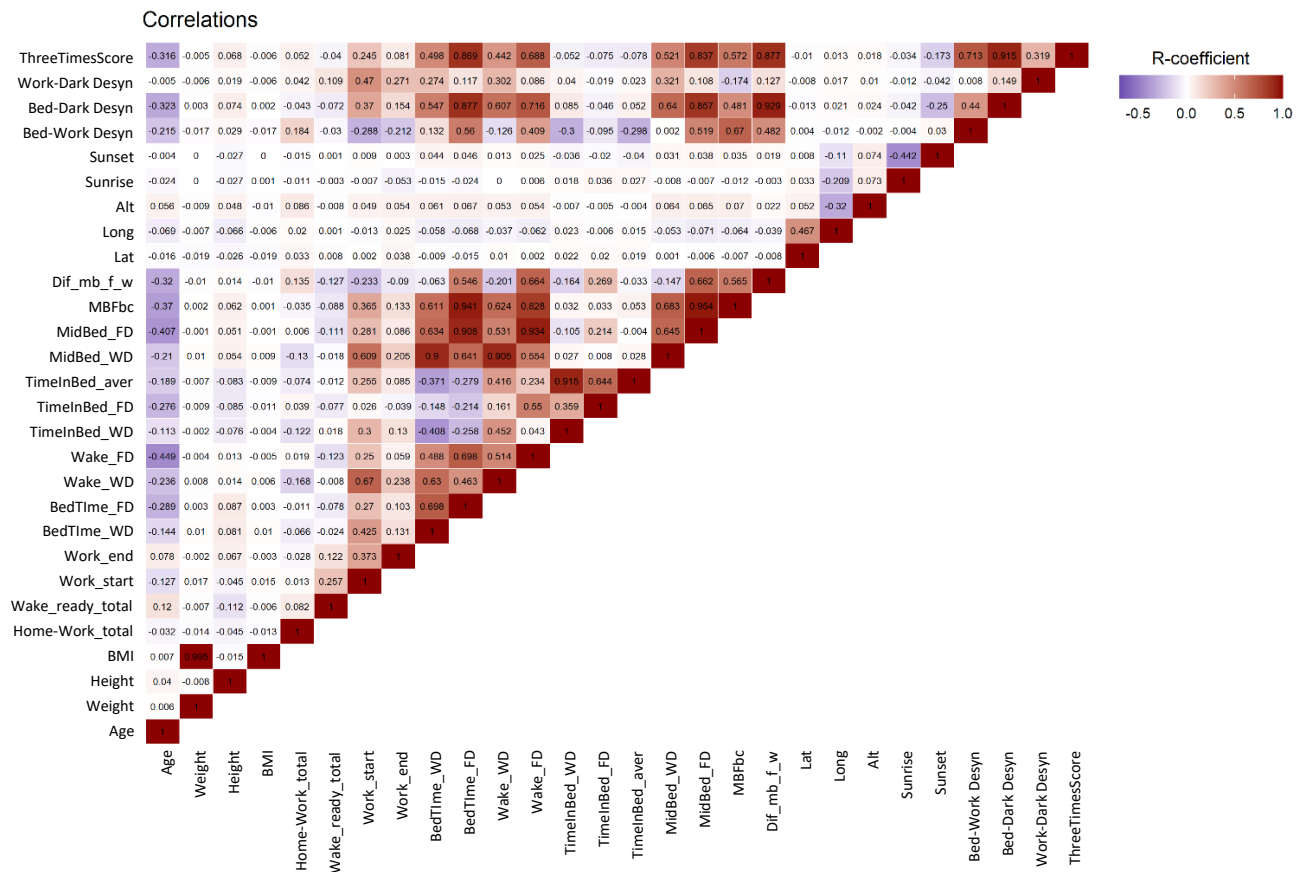

**Figure S1.** Spearman's correlation heatmap with R-coefficient values indicated in each cell. BMI: Body Mass Index ( $\text{kg}/\text{m}^2$ ); wd: work day; fd: free day; MBFbc: modified version of the sleep corrected midsleep in free days (MSFsc); FD: free day; WD: work day. Dif\_mb\_f\_w: difference in bed time free day – work day; Lat: latitude; Long: longitude; Alt: altitude; Bed-Work Desyn: Bed-

Work desynchronization; Bed-Dark Desyn: Bed-Natural Darkness desynchronization; Work-Dark Desyn:: Work-Natural Darkness desynchronization.

**Table S1.** Sleep habits during work days and free days split by gender. Values are represented as mean  $\pm$  SEM, both in decimal and hh:mm format, where appropriate.

|                    | Women             |                  | Men               |                   |
|--------------------|-------------------|------------------|-------------------|-------------------|
|                    | Free day          | Work day         | Free day          | Work day          |
| Bed Onset Time (h) | 24.65 $\pm$ 0.02  | 23.68 $\pm$ 0.02 | 24.91 $\pm$ 0.02  | 23.92 $\pm$ 0.02  |
| (hh:mm)            | 00:39 $\pm$ 00:01 | 23:40 $\pm$ 0:01 | 00:54 $\pm$ 00:01 | 23:55 $\pm$ 00:01 |
| Wake-Up Time (h)   | 9.28 $\pm$ 0.02   | 7.18 $\pm$ 0.02  | 9.21 $\pm$ 0.03   | 7.17 $\pm$ 0.02   |
| (hh:mm)            | 09:16 $\pm$ 0:01  | 07:10 $\pm$ 0:01 | 09:12 $\pm$ 0:01  | 07:10 $\pm$ 0:01  |
| Time in Bed (h)    | 8.63 $\pm$ 0.02   | 7.50 $\pm$ 0.01  | 8.30 $\pm$ 0.02   | 7.25 $\pm$ 0.01   |
| (hh:mm)            | 8:37 $\pm$ 0:01   | 07:30 00:00      | 8:18 $\pm$ 00:01  | 07:15 $\pm$ 00:00 |
| Mid-Bed Time (h)   | 4.97 $\pm$ 0.02   | 3.43 $\pm$ 0.01  | 5.06 $\pm$ 0.02   | 3.54 $\pm$ 0.02   |
| (hh:mm)            | 04:58 $\pm$ 0:01  | 03:25 $\pm$ 0:01 | 05:03 $\pm$ 0:01  | 03:32 $\pm$ 0:01  |

**Table S2.** Other sleep parameters and social habits related to work schedules split by gender. Desynchronization indexes and three times score. Values are represented as mean  $\pm$  SEM, both in decimal and hh:mm format, where appropriate.

|                                                     | Women            | Men              |
|-----------------------------------------------------|------------------|------------------|
|                                                     | BMI              | 22.95 $\pm$ 0.06 |
| Averaged Time in Bed (h)                            | 7.81 $\pm$ 0.01  | 7.54 $\pm$ 0.01  |
| (hh:mm)                                             | 7:48 $\pm$ 0:00  | 7:32 $\pm$ 0:00  |
| MBFbc (h)                                           | 4.53 $\pm$ 0.02  | 4.65 $\pm$ 0.02  |
| (hh:mm)                                             | 04:31 $\pm$ 0:01 | 04:39 $\pm$ 0:01 |
| Difference Mid Bed Time (FD-WD), social jet lag (h) | 1.53 $\pm$ 0.01  | 1.51 $\pm$ 0.02  |
| (hh:mm)                                             | 01:31 $\pm$ 0:00 | 01:30 $\pm$ 0:01 |
| Commute time (min)                                  | 29.00 $\pm$ 0.29 | 26.52 0.30       |
| Time to get ready (min)                             | 56.54 $\pm$ 0.46 | 47.95 0.50       |
| Work Start (h)                                      | 9.17 $\pm$ 0.03  | 8.97 $\pm$ 0.03  |
| (hh:mm)                                             | 09:10 $\pm$ 0:01 | 08:58 $\pm$ 0:01 |
| Work End (hh:mm)                                    | 16.58 $\pm$ 0.04 | 17.04 $\pm$ 0.04 |
| (hh:mm)                                             | 16:34 $\pm$ 0:02 | 17:02 $\pm$ 0:02 |
| Work-Natural Darkness Desynchronization (h)         | 0.10 $\pm$ 0.01  | 0.12 $\pm$ 0.01  |

|                                            |             |             |
|--------------------------------------------|-------------|-------------|
| Bed-Natural Darkness Desynchronization (h) | 2.75 ± 0.02 | 2.93 ± 0.02 |
| Bed-Work Desynchronization (h)             | 0.77 ± 0.01 | 0.80 ± 0.01 |
| Three Times Score (A.U.)                   | 0.10 ± 0.00 | 0.11 ± 0.00 |

BMI: Body Mass Index ( $\text{kg}/\text{m}^2$ ); MBFbc: modified version of the sleep corrected midsleep in free days (MSFsc); FD: free day; WD: work day.

**Table S3.** Sleep habits during work days and free days split by age group. Values are represented as mean  $\pm$  SEM, both in decimal and hh:mm format, where appropriate.

|                    | Work Day          |                   |                   |                   |                   |                   |
|--------------------|-------------------|-------------------|-------------------|-------------------|-------------------|-------------------|
|                    | 13-17 years/old   | 18-30 years/old   | 31-40 years/old   | 41-50 years/old   | 51-64 years/old   | 65-80 years/old   |
| Bed Onset Time (h) | 23.65 $\pm$ 0.04  | 24.10 $\pm$ 0.02  | 23.71 $\pm$ 0.02  | 23.52 $\pm$ 0.02  | 23.67 $\pm$ 0.04  | 23.66 $\pm$ 0.15  |
| (hh:mm)            | 23:39 $\pm$ 00:02 | 00:06 $\pm$ 00:01 | 23:42 $\pm$ 00:01 | 23:31 $\pm$ 00:01 | 23:40 $\pm$ 00:02 | 23:39 $\pm$ 00:09 |
| Wake-Up Time (h)   | 7.14 $\pm$ 0.02   | 7.60 $\pm$ 0.02   | 7.13 $\pm$ 0.02   | 6.84 $\pm$ 0.02   | 6.74 $\pm$ 0.03   | 7.09 $\pm$ 0.17   |
| (hh:mm)            | 07:08 $\pm$ 0:01  | 07:36 $\pm$ 0:01  | 07:07 $\pm$ 0:01  | 06:50 $\pm$ 0:01  | 06:44 $\pm$ 0:01  | 07:05 $\pm$ 0:10  |
| Time in Bed (h)    | 7.48 $\pm$ 0.04   | 7.49 $\pm$ 0.02   | 7.42 $\pm$ 0.02   | 7.31 $\pm$ 0.02   | 7.07 $\pm$ 0.03   | 7.43 $\pm$ 0.15   |
| (hh:mm)            | 7:28 $\pm$ 0:02   | 7:29 $\pm$ 0:01   | 7:25 $\pm$ 0:01   | 7:18 $\pm$ 0:01   | 7:04 $\pm$ 0:01   | 7:25 $\pm$ 0:09   |
| Mid-Bed Time (h)   | 3.40 $\pm$ 0.03   | 3.85 $\pm$ 0.02   | 3.42 $\pm$ 0.02   | 3.18 $\pm$ 0.02   | 3.21 $\pm$ 0.03   | 3.38 $\pm$ 0.14   |
| (hh:mm)            | 03:24 $\pm$ 0:01  | 03:51 $\pm$ 0:01  | 03:25 $\pm$ 0:01  | 03:10 $\pm$ 0:01  | 03:12 $\pm$ 0:01  | 03:22 $\pm$ 0:08  |

|                    | Free Day          |                   |                   |                   |                   |                   |
|--------------------|-------------------|-------------------|-------------------|-------------------|-------------------|-------------------|
|                    | 13-17 years/old   | 18-30 years/old   | 31-40 years/old   | 41-50 years/old   | 51-64 years/old   | 65-80 years/old   |
| Bed Onset Time (h) | 24.92 $\pm$ 0.05  | 25.33 $\pm$ 0.03  | 24.64 $\pm$ 0.03  | 24.26 $\pm$ 0.02  | 24.32 $\pm$ 0.04  | 24.03 $\pm$ 0.14  |
| (hh:mm)            | 00:55 $\pm$ 00:03 | 01:19 $\pm$ 00:01 | 00:38 $\pm$ 00:01 | 00:15 $\pm$ 00:01 | 00:19 $\pm$ 00:02 | 00:01 $\pm$ 00:08 |
| Wake-Up Time (h)   | 10.16 $\pm$ 0.05  | 10.06 $\pm$ 0.03  | 9.04 $\pm$ 0.03   | 8.53 $\pm$ 0.03   | 8.25 $\pm$ 0.04   | 7.80 $\pm$ 0.19   |
| (hh:mm)            | 10:09 $\pm$ 0:03  | 10:03 $\pm$ 0:01  | 09:02 $\pm$ 0:01  | 08:31 $\pm$ 0:01  | 08:15 $\pm$ 0:02  | 07:48 $\pm$ 0:11  |
| Time in Bed (h)    | 9.24 $\pm$ 0.04   | 8.72 $\pm$ 0.02   | 8.39 $\pm$ 0.02   | 8.27 $\pm$ 0.02   | 7.93 $\pm$ 0.04   | 7.77 $\pm$ 0.17   |
| (hh:mm)            | 9:14 $\pm$ 0:02   | 8:43 $\pm$ 0:01   | 8:23 $\pm$ 0:01   | 8:16 $\pm$ 0:01   | 7:55 $\pm$ 0:02   | 7:46 $\pm$ 0:10   |
| Mid-Bed Time (h)   | 5.54 $\pm$ 0.05   | 5.70 $\pm$ 0.02   | 4.84 $\pm$ 0.02   | 4.39 $\pm$ 0.02   | 4.29 $\pm$ 0.04   | 3.91 $\pm$ 0.14   |
| (hh:mm)            | 05:32 $\pm$ 0:03  | 05:42 $\pm$ 0:01  | 04:50 $\pm$ 0:01  | 04:23 $\pm$ 0:01  | 04:17 $\pm$ 0:02  | 03:54 $\pm$ 0:08  |

**Table S4.** Other sleep parameters and social habits related to work schedules split by age group. Desynchronization indexes and three times score. Values are represented as mean  $\pm$  SEM, both in decimal and hh:mm format, where appropriate.

|                                                           | 13-17<br>years/old | 18-30<br>years/old | 31-40 years/old  | 41-50<br>years/old | 51-64 years/old  | 65-80<br>years/old |
|-----------------------------------------------------------|--------------------|--------------------|------------------|--------------------|------------------|--------------------|
| BMI                                                       | 21.04 $\pm$ 0.69   | 22.92 $\pm$ 0.12   | 24.18 $\pm$ 0.07 | 24.85 $\pm$ 0.08   | 25.77 $\pm$ 0.09 | 27.10 $\pm$ 0.13   |
| Averaged Time in Bed (h)                                  | 7.95 $\pm$ 0.04    | 7.84 $\pm$ 0.02    | 7.69 $\pm$ 0.02  | 7.58 $\pm$ 0.02    | 7.31 $\pm$ 0.03  | 7.53 $\pm$ 0.15    |
| MBFbc (h)                                                 | 4.88 $\pm$ 0.04    | 5.22 $\pm$ 0.02    | 4.46 $\pm$ 0.02  | 4.02 $\pm$ 0.02    | 3.94 $\pm$ 0.03  | 3.76 $\pm$ 0.14    |
| (hh:mm)                                                   | 04:52 $\pm$ 0:02   | 05:13 $\pm$ 0:01   | 04:27 $\pm$ 0:01 | 04:01 $\pm$ 0:01   | 03:56 $\pm$ 0:01 | 03:45 $\pm$ 0:08   |
| Difference Mid Bed Time (FD-WD),<br>social jet lag (h)    | 2.14 $\pm$ 0.04    | 1.84 $\pm$ 0.02    | 1.42 $\pm$ 0.02  | 1.21 $\pm$ 0.02    | 1.08 $\pm$ 0.03  | 0.54 $\pm$ 0.07    |
| % with SJL (Difference Mid Bed<br>Time (FD-WD)) > 2 hours | 50.41              | 36.44              | 20.10            | 13.11              | 9.27             | 1.67               |
| Commute time (min)                                        | 20.11 $\pm$ 0.59   | 30.68 $\pm$ 0.41   | 27.29 $\pm$ 0.39 | 28.33 $\pm$ 0.43   | 25.81 $\pm$ 0.60 | 19.77 $\pm$ 2.42   |
| Time to get ready (min)                                   | 43.27 $\pm$ 0.74   | 49.61 $\pm$ 0.60   | 52.64 $\pm$ 0.67 | 57.15 $\pm$ 0.76   | 59.71 $\pm$ 1.10 | 59.52 $\pm$ 4.81   |
| Work Start (h)                                            | 8.41 $\pm$ 0.03    | 9.65 $\pm$ 0.04    | 9.00 $\pm$ 0.04  | 8.72 $\pm$ 0.03    | 8.76 $\pm$ 0.05  | 9.28 $\pm$ 0.20    |
| (hh:mm)                                                   | 08:24 $\pm$ 0:01   | 09:39 $\pm$ 0:02   | 09:00 $\pm$ 0:02 | 08:43 $\pm$ 0:01   | 08:45 $\pm$ 0:03 | 09:16 $\pm$ 0:12   |
| Work End (hh:mm)                                          | 14.93 $\pm$ 0.06   | 16.89 $\pm$ 0.05   | 17.20 $\pm$ 0.05 | 16.76 $\pm$ 0.05   | 16.77 $\pm$ 0.09 | 16.80 $\pm$ 0.44   |
| (hh:mm)                                                   | 14:55 $\pm$ 0:03   | 16:53 $\pm$ 0:03   | 17:12 $\pm$ 0:03 | 16:45 $\pm$ 0:03   | 16:46 $\pm$ 0:05 | 16:48 $\pm$ 0:26   |
| Work-Natural Darkness<br>Desynchronization (h)            | 0.01 $\pm$ 0.00    | 0.13 $\pm$ 0.01    | 0.13 $\pm$ 0.01  | 0.08 $\pm$ 0.01    | 0.11 $\pm$ 0.01  | 0.09 $\pm$ 0.04    |
| Bed-Natural Darkness<br>Desynchronization (h)             | 2.93 $\pm$ 0.04    | 3.46 $\pm$ 0.02    | 2.72 $\pm$ 0.02  | 2.30 $\pm$ 0.02    | 2.26 $\pm$ 0.04  | 2.22 $\pm$ 0.15    |
| Bed-Work Desynchronization (h)                            | 1.26 $\pm$ 0.03    | 0.90 $\pm$ 0.01    | 0.73 $\pm$ 0.01  | 0.62 $\pm$ 0.01    | 0.61 $\pm$ 0.02  | 0.29 $\pm$ 0.06    |
| Three Times Score (A.U.)                                  | 0.12 $\pm$ 0.00    | 0.12 $\pm$ 0.00    | 0.10 $\pm$ 0.00  | 0.08 $\pm$ 0.00    | 0.08 $\pm$ 0.00  | 0.07 $\pm$ 0.01    |

BMI: Body Mass Index; MBFbc: modified version of the sleep corrected midsleep in free days (MSFsc); FD: free day; WD: work day.
